# Supplementary material
Source: ML conference proceedings conference paper supplement (https://openaccess.thecvf.com/content/CVPR2026/html/Wen_CAR-SAM_Cross-Attention_Reconstruction_CVPR_2026_paper.html)
Supplement: Supplementary file 1 [file Wen_CAR-SAM_Cross-Attention_Reconstruction_CVPR_2026_supplemental.pdf]

# CAR-SAM: Cross-Attention Reconstruction for Post-Training Quantization of the Segment Anything Model

## Supplementary Material

### A. The Derivation of Matmul Compensation

#### A.1. Propagation to $Q_{\text{proj}}$

To explicitly compensate for the quantization error introduced by the MatMul operation in attention computation, we formulate the following reconstruction objective. Let the quantized queries and keys be denoted as  $\hat{Q}$  and  $\hat{K}$ , respectively. Our goal is to minimize the reconstruction discrepancy between the full-precision and quantized MatMul outputs:

$$\mathcal{L}^{\text{mse}} = \mathbb{E} \left[ \|QK^\top - \hat{Q}\hat{K}^\top\|_2^2 \right]. \quad (19)$$

To model the quantization-induced perturbations explicitly, we parameterize:

$$\hat{Q} = X_Q(W_Q + \delta W_Q), \quad \hat{K} = K + \delta K. \quad (20)$$

where  $X_Q$  is the full-precision input embedding,  $\delta W_Q$  denotes the compensation term, and  $\delta K = \hat{K} - K$  captures the quantization error. Substituting these into Eq.19 yields:

$$\mathcal{L} = \|QK^\top - X_Q(W_Q + \delta W_Q)(K + \delta K)^\top\|_2^2 + \lambda \|\delta W_Q\|_2^2. \quad (21)$$

where the last term introduces an  $L_2$  regularization to prevent the compensation term  $\delta W_Q$  from overfitting or dominating the original weight  $W_Q$ . By expanding Eq.21 and computing the gradient of the reconstruction objective with respect to the compensation matrix  $\delta W_Q$

$$\frac{\partial \mathcal{L}}{\partial \delta W_Q}$$

$$= 2\lambda \delta W_Q - 2X_Q^\top \left( QK^\top - X_Q \hat{W}_Q (K^\top + \delta K^\top) \right) (K + \delta K). \quad (22)$$

Setting the derivative to zero yields the first-order optimality condition, and  $\hat{K} = K + \delta K$ :

$$2\lambda \delta W_Q - 2X_Q^\top \left( QK^\top - X_Q \hat{W}_Q \hat{K}^\top \right) \hat{K} = 0 \quad (23)$$

$$\Rightarrow \lambda \delta W_Q = X_Q^\top \left( QK^\top - X_Q \hat{W}_Q \hat{K}^\top \right) \hat{K} \quad (24)$$

Rearranging the above equality, we isolate the terms involving  $\delta W_Q$ :

$$\lambda \delta W_Q + X_Q^\top X_Q \delta W_Q (\hat{K}^\top \hat{K}) = X_Q^\top \left( QK^\top - X_Q W_Q \hat{K}^\top \right) \hat{K} \quad (25)$$

$$= X_Q^\top Q (K^\top - \hat{K}^\top) \hat{K} \quad (26)$$

$$= X_Q^\top Q \delta K^\top \hat{K} \quad (27)$$

Multiplying both sides by  $(X_Q^\top X_Q)^{-1}$  from the left gives:

$$(X_Q^\top X_Q)^{-1} \lambda \delta W_Q + \delta W_Q (\hat{K}^\top \hat{K}) = (X_Q^\top X_Q)^{-1} X_Q^\top Q \delta K^\top \hat{K} \quad (28)$$

$$= W_Q \delta K^\top \hat{K}. \quad (29)$$

After rearranging the terms, we obtain a Sylvester-type matrix equation:

$$AX + XB = C. \quad (30)$$

where

$$\begin{aligned} A &= (X_Q^\top X_Q)^{-1} \lambda I, & B &= \hat{K}^\top \hat{K}, \\ C &= W_Q \delta K^\top \hat{K}, & X &= \delta W_Q. \end{aligned} \quad (31)$$

#### A.2. Propagation to $K_{\text{proj}}$

By taking similar steps, to propagate the quantization error of  $\delta Q$  into the key projection  $W_K$ , We rewrite the quantized key and query representations as

$$\hat{K} = X_K(W_K + \delta W_K), \quad \hat{Q} = Q + \delta Q. \quad (32)$$

Substituting these definitions into the reconstruction objective yields the following Eq. 19 :

$$\mathcal{L}^{\text{mse}} = \|QK^\top - (Q + \delta Q)(W_K^\top + \delta W_K^\top)X_K^\top\|_2^2 + \lambda \|\delta W_K\|_2^2. \quad (33)$$

Taking the derivative with respect to  $\delta W_K$  yields:

$$2\lambda \delta W_K - 2X_K^\top \left( KQ^\top - X_K \hat{W}_K \hat{Q}^\top \right) \hat{Q} = 0 \quad (34)$$

$$\Rightarrow \lambda \delta W_K = X_K^\top \left( KQ^\top - X_K \hat{W}_K \hat{Q}^\top \right) \hat{Q} \quad (35)$$

Rearranging terms:

$$\begin{aligned} &\Rightarrow \lambda \delta W_K + X_K^\top X_K \delta W_K (\hat{Q}^\top \hat{Q}) \\ &= X_K^\top \left( KQ^\top - X_K W_K \hat{Q}^\top \right) \hat{Q} \\ &= X_K^\top K (Q^\top - \hat{Q}^\top) \hat{Q} \\ &= X_K^\top K \delta Q^\top \hat{Q} \end{aligned} \quad (36)$$

Finally, left-multiplying by  $(X_K^\top X_K)^{-1}$  isolates  $\delta W_K$ :

$$\begin{aligned} &\Rightarrow (X_K^\top X_K)^{-1} \lambda I \delta W_K + \delta W_K (\hat{Q}^\top \hat{Q}) \\ &= (X_K^\top X_K)^{-1} X_K^\top K \delta Q^\top \hat{Q} \\ &= W_K \delta Q^\top \hat{Q} \end{aligned} \quad (37)$$

We get a same expression as 30 where:

$$\begin{aligned} A &= (X_K^\top X_K)^{-1} \lambda I, & B &= \hat{Q}^\top \hat{Q}, \\ C &= W_K \delta Q^\top \hat{Q}, & X &= \delta W_K. \end{aligned} \quad (38)$$

At this point, both the query- and key-side compensation equations share the same dependency on the inverse activation hessian matrices  $(X_K^\top X_K)^{-1}$  and  $(X_Q^\top X_Q)^{-1}$ . We address this problem by performing singular value decomposition (SVD) on the matrix:

$$X^\top X = U \Sigma V^\top, \quad (39)$$

where  $\Sigma = \text{diag}(\sigma_1, \sigma_2, \dots, \sigma_n)$  contains the singular values in descending order. We select the smallest  $N$  such that the cumulative energy satisfies

$$\frac{\sum_{i=1}^N \sigma_i}{\sum_{i=1}^n \sigma_i} \geq t, \quad (40)$$

The ratio threshold  $t$  is empirically set to 0.1. and define  $\lambda$  as the mean of these top- $N$  singular values:

$$\lambda = \frac{1}{N} \sum_{i=1}^N \sigma_i. \quad (41)$$

### A.3. Propagation to $V_{\text{proj}}$

To mitigate the degradation of the attention map  $A$ , the reconstruction objective is defined as:

$$\begin{aligned} \mathcal{L} &= \|AV - \hat{A}\hat{V}\|_2^2 \\ \Rightarrow \mathcal{L} &= \|AV - (A + \delta A)X_V(W_V + \delta W_V)\|_2^2 \\ &\quad + \lambda \|\delta W_V\|_2^2, \end{aligned} \quad (42)$$

where  $A$  denotes the full-precision attention map,  $\hat{A}$  represents its dequantized counterpart,  $X_V$  is the quantized input to the value projection,  $W_V$  is the original value projection weight, and  $\delta W_V$  is the learnable compensation term. By taking the derivative of  $\mathcal{L}$  with respect to  $\delta W_V$  and setting it to zero:

$$\begin{aligned} \frac{\partial \mathcal{L}}{\partial \delta W_V} &= 2\lambda \delta W_V - 2\hat{A}X_V^\top (AV - \hat{A}X_V(W_V + \delta W_V)) \end{aligned} \quad (43)$$

$$\frac{\partial \mathcal{L}}{\partial \delta W_V} = 0 \quad (44)$$

$$\Rightarrow \lambda \delta W_V = X_V^\top \hat{A}^\top (AV - \hat{A}X_V(W_V + \delta W_V)) \quad (45)$$

$$\Rightarrow (X_V^\top \hat{A}^\top \hat{A}X_V + \lambda I)^{-1} \delta W_V = X_V^\top \hat{A}^\top (A - \hat{A})V \quad (46)$$

we obtain the following closed-form solution:

$$\delta W_V = (X_V^\top \hat{A}^\top \hat{A}X_V + \lambda I)^{-1} X_V^\top \hat{A}^\top (A - \hat{A})V, \quad (47)$$

## B. The Proof of Joint Cross-Attention Reconstruction

### B.1. The Derivation of Theorem 3.1

For each cross-attention module  $F_i$ , we minimize its corresponding MSE reconstruction loss defined as:

$$\mathcal{L} = \mathbb{E} \left[ \left\| F_i(\hat{\mathbf{T}}, \hat{\mathbf{I}}, \hat{\mathbf{W}}) - F_i(\mathbf{T}, \mathbf{I}, \mathbf{W}) \right\|_2^F \right], \quad (48)$$

where  $\mathbf{T}$  and  $\mathbf{I}$  denote the prompt tokens and image embeddings. Formally, let the two consecutive cross-attention modules be denoted as  $f$  and  $g$ . The first token-to-image cross-attention module updates the prompt tokens  $\mathbf{T}' = f(\mathbf{I}, \mathbf{T})$ , and the subsequent image-to-token cross-attention refines the image embeddings  $\mathbf{I}' = g(\mathbf{I}, \mathbf{T}')$ . Let the ground-truth inputs be  $(T, I)$ , and their quantized versions be  $(T + \Delta T, I + \Delta I)$ . The output perturbation is defined as

$$\Delta T' = f(T + \Delta T, I + \Delta I) - f(T, I). \quad (49)$$

Since  $\Delta T$  and  $\Delta I$  are small perturbations, a first-order Taylor expansion around  $(T, I)$  yields

$$f(T + \Delta T, I + \Delta I) \approx f(T, I) + J_f^{(T)} \Delta T + J_f^{(I)} \Delta I. \quad (50)$$

Hence the output error satisfies

$$\Delta T' \approx J_f^{(T)} \Delta T + J_f^{(I)} \Delta I \quad (51)$$

The subsequent image-to-token cross-attention takes  $(I, T')$  as input. Let the floating-point output be  $I^* = g(I, T')$  and the quantized output be  $\hat{I}' = g(I + \Delta I, T' + \Delta T')$ . The induced quantization error is

$$\Delta I' = \hat{I}' - I^* = g(I + \Delta I, T' + \Delta T') - g(I, T'). \quad (52)$$

A first-order Taylor expansion gives

$$\Delta I' \approx J_g^{(I)} \Delta I + J_g^{(T')} \Delta T' \quad (53)$$

Substituting the expression of  $\Delta T'$  from the first module into the second yields

$$\Delta I' = J_g^{(I)} \Delta I + J_g^{(T')} \left( J_f^{(T)} \Delta T + J_f^{(I)} \Delta I \right). \quad (54)$$

Collecting terms leads to the coupled first-order error propagation equation:

$$\Delta I' = \left( J_g^{(I)} + J_g^{(T')} J_f^{(I)} \right) \Delta I + \left( J_g^{(T')} J_f^{(T)} \right) \Delta T \quad (55)$$

And then we get Theorem 3.1:

$$\Delta I' \approx \underbrace{J_g^{(T')} (J_f^{(T)} \Delta T + J_f^{(I)} \Delta I)}_{\text{inter-branch-feedback term}} + J_g^{(I)} \Delta I \quad (56)$$

## B.2. The Derivation of Corollary 3.2

The reconstruction loss in Eq. 48 is defined as

$$\mathcal{L} = \|\Delta I'\|_2^2. \quad (57)$$

This loss quantifies how quantization-induced deviations propagate across the two cross-attention modules. Among the two perturbation sources, only the upstream error  $\delta f = \delta f(s_f)$  depends on the quantization scale  $s_f$ , while the downstream term  $\delta g$  reflects the intrinsic noise of the second module and therefore remains independent of  $s_f$ . This asymmetry is what enables a meaningful gradient signal for adjusting the upstream scale.

According to Theorem 3.1, the deviation at the output of the second cross-attention can be expressed as

$$\Delta I' \approx J_g^{(T')} (J_f^{(T)} \Delta T + J_f^{(I)} \Delta I) + J_g^{(I)} \Delta I, \quad (58)$$

For clarity, we introduce shorthand notations that group the two perturbation components: let  $\delta f$  collect the first-module contribution  $J_f^{(T)} \Delta T + J_f^{(I)} \Delta I$ , and let  $\delta g$  denote the second-module perturbation  $J_g^{(I)} \Delta I$ . Using these definitions, the expression can be rewritten as

$$\Delta I' = J_g^{(T')} \delta f + \delta g. \quad (59)$$

Using this expression, the loss becomes

$$\mathcal{L}(s_f) = (J_g^{(T')} \delta f + \delta g)^\top (J_g^{(T')} \delta f + \delta g), \quad (60)$$

which shows that the dependence on  $s_f$  enters exclusively through  $\delta f$ . Applying the standard identity for squared norms yields

$$\frac{\partial \mathcal{L}}{\partial s_f} = 2 (\Delta I')^\top \frac{\partial \Delta I'}{\partial s_f}. \quad (61)$$

Since  $J_g^{(T')}$  and  $\delta g$  do not depend on  $s_f$ , we have

$$\frac{\partial \Delta I'}{\partial s_f} = J_g^{(T')} \frac{\partial \delta f}{\partial s_f}. \quad (62)$$

Substituting this relation back into the gradient of the loss gives

$$\frac{\partial \mathcal{L}}{\partial s_f} = 2 (J_g^{(T')} \delta f + \delta g)^\top J_g^{(T')} \frac{\partial \delta f}{\partial s_f}. \quad (63)$$

Because this quantity is scalar, the transpose can be moved to obtain the more compact form

$$\nabla_{s_f} \mathcal{L} = 2 (J_g^{(T')})^\top (J_g^{(T')} \delta f + \delta g) \frac{\partial \delta f}{\partial s_f}. \quad (64)$$

| Variant | Setting | FP   | BRECQ | QDrop | PTQ4SAM     | CAR-SAM     |
|---------|---------|------|-------|-------|-------------|-------------|
| SAM2-T  | W6A6    | 74.6 | 70.3  | 72.1  | 73.6        | <b>74.4</b> |
|         | W4A4    |      | 52.8  | 62.8  | 67.8        | <b>68.5</b> |
| SAM2-S  | W6A6    | 74.6 | 71.4  | 71.7  | 73.1        | <b>73.1</b> |
|         | W4A4    |      | 43.9  | 62.2  | 67.3        | <b>67.8</b> |
| SAM2-B+ | W6A6    | 73.9 | 71.6  | 72.7  | <b>73.1</b> | 72.8        |
|         | W4A4    |      | 41.8  | 64.5  | 65.6        | <b>66.6</b> |
| SAM2-L  | W6A6    | 75.0 | 70.7  | 70.4  | 73.2        | <b>73.4</b> |
|         | W4A4    |      | –     | 57.9  | <b>65.6</b> | 64.1        |

Table 6. Detection results of quantized SAM2 on COCO (vertical layout). FP denotes the full-precision reference. “–” indicates unavailable.

## C. The Objection Detection Results of SAM2

Table 6 presents the object detection performance of various quantization methods applied to the SAM2 model family, evaluated on the COCO dataset. We report results across four SAM2 variants: SAM2-T, SAM2-S, SAM2-B+, and SAM2-L, under full-precision (FP), W6A6, and W4A4 settings.

In the 6-bit (W6A6) setting, all methods demonstrate acceptable retention of performance, with CAR-SAM consistently matching or slightly surpassing other baselines across most variants. For instance, CAR-SAM achieves 74.0 mAP on SAM2-T, comparable to the FP score of 74.6, and higher than BRECQ and QDrop in the same configuration. In the more challenging 4-bit (W4A4) regime, CAR-SAM maintains competitive accuracy across all variants and surpasses other methods on SAM2-B+ with a score of 66.6 and on SAM2-T with 68.0.

These results validate the robustness of our approach, particularly under aggressive quantization, and highlight its ability to preserve detection performance with minimal degradation compared to full precision.

## D. Pseudocode of CAR-SAM

To help readers better understand our method, we provide pseudocode for solving the Sylvester equation as well as the overall pipeline.

---

**Algorithm 1** Post-training quantization pipeline of CAR-SAM

---

**Require:** Full-precision SAM model  $M$ , calibration set  $\mathcal{D}_{cal}$

**Ensure:** Quantized model  $\hat{M}$

```
1: Initialize quantized model  $\hat{M}$  from  $M$ 
2: for each image-to-token cross-attention module  $C_i$  in  $\hat{M}$  do
3:   for  $W \in \{W_Q, W_K\}$  do
4:     Collect calibration activations from  $\mathcal{D}_{cal}$ 
5:     Compute matrices  $A, B, C$  ▷ see Eqs. (7) and (10)
6:     Solve the Sylvester equation  $AX + XB = C$  to obtain  $\delta W$  ▷ see Eq. (6)
7:     Update weights:  $W \leftarrow W + \delta W$ 
8:   end for
9:   for  $W = W_V$  do ▷ see Eq. (12)
10:    Compute closed-form solution for  $\delta W$ 
11:    Update weights:  $W \leftarrow W + \delta W$ 
12:   end for
13: end for
14: for each block  $B_i$  in  $\hat{M}$  do
15:   if  $B_i$  is a paired cross-attention block  $(f_i, g_i)$  then
16:     for each reconstruction step do
17:       Sample a mini-batch  $X_i$  from  $\mathcal{D}_{cal}$ 
18:       Compute full-precision and quantized outputs of  $(f_i, g_i)$ 
19:       Minimize the joint reconstruction loss:  $\mathcal{L}_{rec} = \left\| F_{f_i, g_i}(\hat{T}, \hat{I}, \hat{W}) - F_{f_i, g_i}(T, I, W) \right\|_2^2$  ▷ see Theorem 3.2
20:       Update LSQ step sizes and quantization parameters jointly
21:     end for
22:   else
23:     for each reconstruction step do
24:       Sample a mini-batch  $X_i$  from  $\mathcal{D}_{cal}$ 
25:       Compute full-precision and quantized outputs of  $B_i$ 
26:       Minimize the block-wise reconstruction loss:  $\left\| F(\hat{x}, \hat{w}) - F(x, w) \right\|_2^2$ 
27:       Update LSQ step sizes and quantization parameters
28:     end for
29:   end if
30: end for
31: return  $\hat{M}$ 
```

---

---

```

1 from scipy.linalg import solve_sylvester
2 def solve_Sylvester_equation(X_q, W_q, K, K_hat, lam=1e3, bias=None):
3     """
4     Solve the Sylvester equation for Q-branch compensation.
5
6     The K-branch is handled in the same way by swapping Q and K,
7     resulting in a corresponding Sylvester equation to solve for
8     the compensation matrix of W_K.
9
10    Args:
11    X_q: input activation of Q projection, shape [..., d_in]
12    W_q: Q projection weight, shape [d_out, d_in]
13    K: full-precision key features, shape [..., d_out]
14    K_hat: quantized/dequantized key features, shape [..., d_out]
15    lam: regularization coefficient
16    bias: optional bias of Q projection, shape [d_out]
17
18    Returns:
19    delta_W: compensation matrix for W_q
20    """
21    # flatten token dimensions
22    X_q = X_q.reshape(-1, X_q.shape[-1])
23    K = K.reshape(-1, K.shape[-1])
24    K_hat = K_hat.reshape(-1, K_hat.shape[-1])
25
26    # absorb bias into an augmented weight matrix
27    if bias is not None:
28        W_q = torch.cat([W_q, bias.unsqueeze(1)], dim=1).T
29        X_q = torch.cat(
30            [X_q, torch.ones(X_q.shape[0], 1, device=X_q.device, dtype=X_q.dtype)],
31            dim=1
32        )
33    else:
34        W_q = W_q.T
35
36    # construct Sylvester equation: A X + X B = C
37    A = lam * (X_q.T @ X_q)
38    B = K_hat.T @ K_hat
39    C = W_q @ ((K - K_hat).T @ K_hat)
40
41    # solve on CPU with scipy
42    delta_W = solve_sylvester(
43        A.detach().cpu().numpy(),
44        B.detach().cpu().numpy(),
45        C.detach().cpu().numpy()
46    )
47
48    return torch.from_numpy(delta_W).to(X_q.device).to(X_q.dtype)

```

---

Figure 7. Pytorch-like code snippet of the Q-branch MatMul-aware compensation. The function constructs the Sylvester equation  $AX + XB = C$  and solves for the compensation matrix  $\Delta W$ .
